# Supplementary material
Source: MDPI journal article supplement (https://www.mdpi.com/2673-4591/6/1/26)
Supplement: s1 [file s1]

# Modifications of the PAMONO-sensor help to size and quantify low number of individual biological and non-biological nano-particles.

R.M. Talukder<sup>1</sup>, A.S.H. Rakib<sup>1</sup>, J. Skolnik<sup>1</sup>, Z. Usfoor<sup>1</sup>, K. Kaufmann<sup>1</sup>, R. Hergenröder<sup>1</sup>, V. Shpacovitch<sup>1</sup>

<sup>1</sup>Leibniz-Institut für Analytische Wissenschaften-ISAS-e.V., Bunsen-Kirchhoff-Straße 11, 44139 Dortmund, Germany  
E-mail: victoria.shpacovitch@isas.de

## Introduction

In the series of works, we demonstrated that plasmon assisted microscopy of nano-objects (PAMONO) technique can be successfully employed for sizing and quantification of viruses, microvesicles and charged non-biological particles. The PAMONO-sensor allows for label-free and specific detection of **individual biological nano-particles**. In order to achieve homogeneous illumination and enlarged focused image area on the sensor slide, the PAMONO-sensor configuration was modified. These modifications are discussed in the present work. In future, applied modifications will help to analyze samples with low concentration of target nano-particles and also help to gain biochemical information about nano-vesicles of interest.

## Aims of studies

- 1) Verify whether dependency between the value of light intensity step and size of nanoparticles remains linear for modified PAMONO-sensor.
- 2) Confirm the ability of the PAMONO-sensor to detect simultaneously 800nm and 200nm silica particles (they may serve as optical models of bacteria and viruses).
- 3) Verify whether formation the layers of biological molecules: Cys-conjugated protein A/G and antibodies remains detectable after applied sensor modifications.
- 4) Define possible duration time for the analysis of nano-particle samples using one sensor chip without its replacement.

## Detection of single particles, not particle layers

**Classical SPR:** The signal appears as a result of the resonance curve shift after formation of the biomolecule layer onto sensor surface.

**PAMONO-sensor:** Particle binding signal appears as a bright spot on a gray background. Secondary concentric plasmonic waves help to visualize a signal.

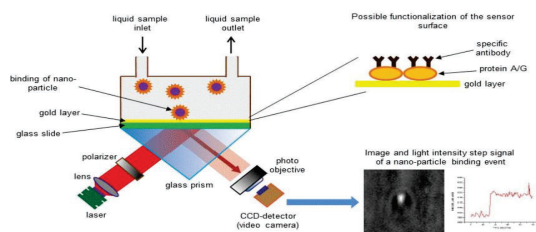

## Standard and modified PAMONO-sensor

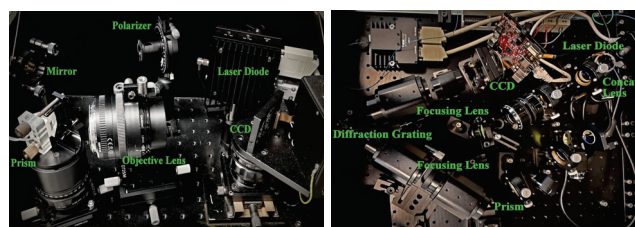

Standard PAMONO-sensor

Modified PAMONO-sensor

In the modified PAMONO-sensor setup, a concave lens was employed to obtain homogeneous illumination of the gold sensor chip surface. Further, the enlargement of the image focused area for the modified PAMONO-sensor was achieved via mounting of a diffraction grating.

## Results

It was important to verify whether key characteristics of the PAMONO-sensor demonstrated in our previous works (Gurevich, 2011), (Shpacovitch, 2015) (Shpacovitch, 2017) remain unchanged after modifications of the instrument's optical scheme. Thus, we proved that the modified PAMONO-sensor still demonstrates linear dependency between the value of intensity step and the size of analyzed nanoparticles. Further, we also show that modified PAMONO-sensor retains the traits of classical SPR sensors and helps to monitor the coating of sensor surface with different proteins such as Cys-conjugated protein A/G and antibodies, for example.

### 1. Dependency between the value of intensity step and the size of nanoparticles (200nm polystyrene particles were used; modified PAMONO-sensor).

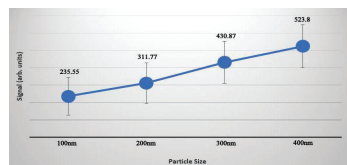

### 2. Monitoring the adhesion of Cys-protein A/G to the gold sensor surface of the modified PAMONO-sensor.

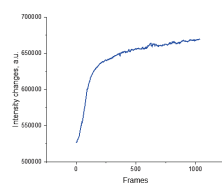

### 3. Simultaneous detection of 800nm and 200nm silica particles using modified PAMONO-sensor.

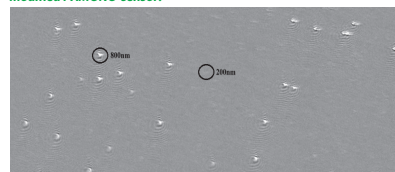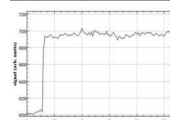

Step signal of an 800nm particle. Signal value is around 900 a.u.

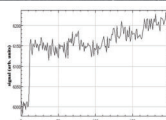

Step signal of a 200nm particle. Signal value is around 150 a.u.

### 4. Changes the number of signals appeared per recorded image during sample analysis (200nm polystyrene particles were used in experiments performed on standard and modified PAMONO-sensors).

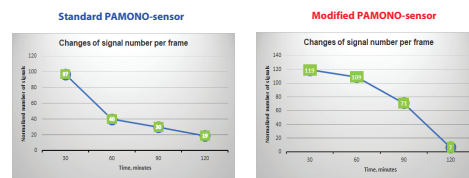

The received data were normalized according to the image area and also the concentration of the nano-particles used for analysis.

### 5. Changes the value of intensity step signal monitored during sample analysis (200nm polystyrene particles were used in experiments performed on standard and modified PAMONO-sensors).

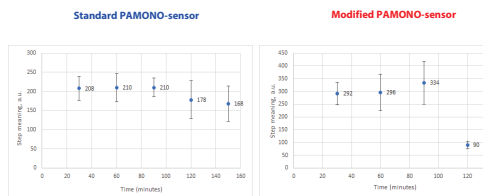

## Perspectives:

1. Define possible duration time for the analysis of samples containing biological nano-particles.
2. Confirm the power of the modified PAMONO-sensor for sizing and quantification of nano-particles in low concentrated samples

## References:

- 1) Shpacovitch V. et al., *Analytica Chimica Acta* (2018) 1005 pp 1-15
- 2) Shpacovitch V. et al., *Sensors* (2017) 17, 244; 10.3390/s17020244
- 3) Shpacovitch V. et al., *Analyt. Biochemistry* (2015) 486 pp 62-69.
- 4) Gurevich E. et al., *Sensors and Actuators B* (2011) 160 pp 1210-1215.
